# Supplementary material for: What are effective strategies for the implementation of care bundles on ICUs: a systematic review
Source: PubMed Central journal article supplement (PMC4536788; doi:10.1186/s13012-015-0306-1), 2015-08-15
Supplement: 13012_2015_306_MOESM2_ESM.pdf [file 13012_2015_306_MOESM2_ESM.pdf]

Additional file 2 Quality assessments using the 27 criteria of the checklist of Downs & Black [18]

| Central line bundle | 1 | 2 | 3 | 4 | 5 | 6 | 7 | 8 | 9 | 10 | 11 | 12 | 13 | 14 | 15 | 16 | 17 | 18 | 19 | 20 | 21 | 22 | 23 | 24 | 25 | 26 | 27 | Total score |
|---------------------|---|---|---|---|---|---|---|---|---|----|----|----|----|----|----|----|----|----|----|----|----|----|----|----|----|----|----|-------------|
| Marra, 2010         | 1 | 1 | 1 | 1 | 0 | 1 | 1 | 0 | 1 | 1  | 1  | 1  | 1  | 0  | 0  | 1  | 1  | 1  | 1  | 1  | 1  | 1  | 0  | 0  | 0  | 1  | 0  | 19          |
| Jeong, 2013         | 1 | 1 | 1 | 1 | 1 | 1 | 1 | 0 | 1 | 1  | 1  | 1  | 1  | 0  | 0  | 1  | 1  | 1  | 1  | 1  | 1  | 1  | 0  | 0  | 0  | 1  | 0  | 20          |
| Richardson, 2012    | 1 | 1 | 0 | 1 | 0 | 0 | 0 | 0 | 1 | 0  | 1  | 1  | 1  | 0  | 0  | 0  | 1  | 0  | 1  | 0  | 1  | 1  | 0  | 0  | 0  | 0  | 0  | 11          |
| Bonello, 2008       | 1 | 1 | 0 | 1 | 1 | 0 | 0 | 0 | 1 | 0  | 1  | 0  | 1  | 0  | 0  | 1  | 1  | 0  | 1  | 1  | 1  | 1  | 0  | 0  | 0  | 1  | 0  | 14          |
| Exline, 2013        | 1 | 1 | 0 | 1 | 1 | 1 | 1 | 0 | 1 | 1  | 1  | 1  | 1  | 0  | 0  | 1  | 1  | 1  | 1  | 1  | 1  | 1  | 0  | 0  | 0  | 1  | 0  | 19          |
| Longmate, 2011      | 1 | 1 | 1 | 1 | 0 | 1 | 1 | 0 | 1 | 1  | 1  | 1  | 1  | 0  | 0  | 1  | 1  | 1  | 1  | 1  | 1  | 1  | 0  | 0  | 0  | 1  | 0  | 19          |
| McPeake, 2012       | 1 | 0 | 0 | 1 | 0 | 0 | 0 | 0 | 1 | 0  | 1  | 0  | 1  | 0  | 0  | 1  | 1  | 0  | 1  | 1  | 1  | 1  | 0  | 0  | 0  | 1  | 0  | 12          |
| Hocking, 2013       | 1 | 1 | 1 | 1 | 0 | 1 | 1 | 0 | 1 | 1  | 1  | 0  | 1  | 0  | 0  | 1  | 1  | 1  | 1  | 1  | 1  | 1  | 0  | 0  | 0  | 1  | 0  | 18          |
| Render, 2011        | 1 | 1 | 0 | 1 | 0 | 1 | 1 | 0 | 1 | 1  | 1  | 1  | 1  | 0  | 0  | 1  | 1  | 1  | 1  | 1  | 1  | 1  | 0  | 0  | 0  | 1  | 0  | 18          |
| McNamara, 2011      | 1 | 1 | 0 | 1 | 0 | 1 | 0 | 0 | 1 | 0  | 1  | 1  | 1  | 0  | 0  | 1  | 1  | 0  | 1  | 1  | 1  | 1  | 0  | 0  | 0  | 1  | 0  | 15          |
| Helmick, 2014       | 1 | 1 | 0 | 1 | 0 | 0 | 1 | 0 | 1 | 1  | 1  | 0  | 1  | 0  | 0  | 1  | 1  | 1  | 1  | 1  | 1  | 1  | 0  | 0  | 0  | 1  | 0  | 16          |
| Khalid, 2013        | 1 | 1 | 0 | 1 | 0 | 0 | 1 | 0 | 1 | 1  | 1  | 0  | 1  | 0  | 0  | 1  | 1  | 1  | 1  | 1  | 1  | 1  | 0  | 0  | 0  | 1  | 0  | 16          |
| Sacks, 2014         | 1 | 1 | 1 | 1 | 0 | 1 | 1 | 0 | 1 | 1  | 1  | 1  | 1  | 0  | 0  | 1  | 1  | 1  | 1  | 1  | 1  | 1  | 0  | 0  | 0  | 1  | 0  | 19          |

| Ventilator bundle | 1 | 2 | 3 | 4 | 5 | 6 | 7 | 8 | 9 | 10 | 11 | 12 | 13 | 14 | 15 | 16 | 17 | 18 | 19 | 20 | 21 | 22 | 23 | 24 | 25 | 26 | 27 | Total score |
|-------------------|---|---|---|---|---|---|---|---|---|----|----|----|----|----|----|----|----|----|----|----|----|----|----|----|----|----|----|-------------|
| Hatler, 2006      | 1 | 0 | 1 | 1 | 0 | 0 | 0 | 0 | 1 | 0  | 1  | 1  | 1  | 0  | 0  | 1  | 1  | 0  | 1  | 1  | 1  | 1  | 0  | 0  | 0  | 1  | 0  | 14          |
| Malouf T, 2013    | 1 | 1 | 0 | 1 | 0 | 1 | 1 | 0 | 1 | 1  | 1  | 1  | 1  | 0  | 0  | 1  | 1  | 1  | 1  | 1  | 1  | 1  | 0  | 0  | 0  | 1  | 0  | 18          |
| Lawrence, 2012    | 1 | 1 | 0 | 1 | 0 | 1 | 1 | 0 | 1 | 1  | 1  | 1  | 1  | 0  | 0  | 1  | 1  | 1  | 1  | 1  | 1  | 1  | 0  | 0  | 0  | 1  | 0  | 18          |
| Morris, 2011      | 1 | 1 | 1 | 1 | 0 | 1 | 1 | 0 | 1 | 1  | 1  | 1  | 1  | 0  | 0  | 1  | 1  | 1  | 1  | 1  | 1  | 1  | 0  | 0  | 0  | 1  | 0  | 19          |
| Hawe, 2009        | 1 | 1 | 1 | 1 | 1 | 1 | 1 | 0 | 1 | 1  | 1  | 1  | 1  | 0  | 0  | 1  | 1  | 1  | 1  | 1  | 1  | 1  | 0  | 0  | 0  | 1  | 0  | 20          |
| Bloos, 2009       | 1 | 1 | 1 | 1 | 0 | 1 | 1 | 0 | 1 | 1  | 1  | 1  | 1  | 0  | 0  | 1  | 1  | 1  | 1  | 1  | 1  | 1  | 0  | 0  | 0  | 1  | 0  | 19          |
| Rello, 2013       | 1 | 1 | 1 | 1 | 0 | 1 | 1 | 0 | 1 | 1  | 1  | 1  | 1  | 0  | 0  | 1  | 1  | 1  | 1  | 1  | 1  | 1  | 0  | 0  | 0  | 1  | 0  | 19          |
| Bukhari, 2012     | 1 | 1 | 1 | 1 | 0 | 0 | 0 | 0 | 1 | 1  | 1  | 1  | 1  | 0  | 0  | 1  | 1  | 0  | 1  | 1  | 1  | 1  | 0  | 0  | 0  | 1  | 0  | 16          |
| Marra, 2009       | 1 | 1 | 1 | 1 | 1 | 1 | 1 | 0 | 1 | 1  | 1  | 1  | 1  | 0  | 0  | 1  | 1  | 1  | 1  | 1  | 1  | 1  | 0  | 0  | 0  | 1  | 0  | 20          |
| Caserta, 2012     | 1 | 1 | 1 | 1 | 1 | 1 | 1 | 0 | 1 | 1  | 1  | 1  | 1  | 0  | 0  | 1  | 1  | 1  | 1  | 1  | 1  | 1  | 0  | 0  | 0  | 1  | 0  | 20          |
| Esmail, 2008      | 1 | 1 | 1 | 1 | 0 | 1 | 0 | 0 | 1 | 0  | 1  | 1  | 1  | 0  | 0  | 0  | 1  | 0  | 1  | 1  | 1  | 1  | 0  | 0  | 0  | 1  | 0  | 15          |
| Youngquist, 2007  | 1 | 0 | 0 | 1 | 0 | 1 | 0 | 0 | 1 | 1  | 1  | 1  | 1  | 0  | 0  | 1  | 1  | 0  | 1  | 1  | 1  | 1  | 0  | 0  | 0  | 1  | 0  | 15          |
| Zaydfudim, 2009   | 1 | 1 | 1 | 1 | 0 | 1 | 1 | 0 | 1 | 1  | 1  | 1  | 1  | 0  | 0  | 1  | 1  | 1  | 1  | 1  | 1  | 1  | 0  | 0  | 0  | 1  | 0  | 19          |
| Al-Tawfiq, 2010   | 1 | 1 | 1 | 1 | 0 | 1 | 0 | 0 | 1 | 0  | 1  | 1  | 1  | 0  | 0  | 1  | 1  | 1  | 1  | 1  | 1  | 1  | 0  | 0  | 0  | 1  | 0  | 17          |
| Bonello, 2008     | 1 | 1 | 0 | 1 | 1 | 0 | 0 | 0 | 1 | 0  | 1  | 0  | 1  | 0  | 0  | 1  | 1  | 0  | 1  | 1  | 1  | 1  | 0  | 0  | 0  | 1  | 0  | 14          |
| Miller, 2010      | 1 | 1 | 1 | 1 | 0 | 1 | 1 | 0 | 1 | 1  | 1  | 1  | 1  | 0  | 0  | 1  | 1  | 1  | 1  | 1  | 1  | 1  | 0  | 0  | 0  | 1  | 0  | 19          |
| DePalo, 2010      | 1 | 1 | 0 | 1 | 0 | 1 | 1 | 0 | 1 | 1  | 1  | 1  | 1  | 0  | 0  | 1  | 1  | 1  | 1  | 1  | 1  | 1  | 0  | 0  | 0  | 1  | 0  | 18          |
| Jimenez, 2009     | 1 | 1 | 1 | 1 | 0 | 0 | 1 | 0 | 1 | 1  | 1  | 1  | 1  | 0  | 0  | 1  | 1  | 1  | 1  | 1  | 1  | 1  | 0  | 0  | 0  | 1  | 0  | 18          |
| DuBose, 2008      | 1 | 1 | 0 | 1 | 0 | 0 | 1 | 0 | 1 | 0  | 1  | 1  | 1  | 0  | 0  | 0  | 1  | 0  | 1  | 1  | 0  | 0  | 0  | 0  | 0  | 1  | 0  | 12          |
| Berenholtz, 2011  | 1 | 1 | 1 | 1 | 1 | 1 | 1 | 0 | 1 | 1  | 1  | 1  | 1  | 0  | 0  | 1  | 1  | 1  | 1  | 1  | 1  | 1  | 0  | 0  | 0  | 1  | 0  | 20          |
| Crunden, 2005     | 1 | 1 | 1 | 1 | 0 | 1 | 1 | 0 | 1 | 0  | 1  | 1  | 1  | 0  | 0  | 1  | 1  | 1  | 1  | 1  | 1  | 1  | 0  | 0  | 0  | 1  | 0  | 18          |
| Berenholtz, 2004  | 1 | 1 | 0 | 1 | 1 | 1 | 1 | 0 | 1 | 1  | 1  | 1  | 1  | 0  | 0  | 1  | 1  | 1  | 1  | 1  | 1  | 1  | 0  | 0  | 0  | 1  | 0  | 19          |
| Eom, 2014         | 1 | 1 | 1 | 1 | 0 | 0 | 1 | 0 | 1 | 0  | 1  | 1  | 1  | 0  | 0  | 1  | 1  | 1  | 1  | 1  | 1  | 1  | 0  | 0  | 0  | 1  | 0  | 17          |
| Hamishehkar, 2014 | 1 | 1 | 1 | 1 | 0 | 1 | 1 | 0 | 1 | 1  | 1  | 1  | 1  | 0  | 0  | 1  | 1  | 1  | 0  | 0  | 1  | 1  | 0  | 0  | 0  | 1  | 0  | 17          |
| Helmick, 2014     | 1 | 1 | 0 | 1 | 0 | 0 | 1 | 0 | 1 | 1  | 1  | 0  | 1  | 0  | 0  | 1  | 1  | 1  | 1  | 1  | 1  | 1  | 0  | 0  | 0  | 1  | 0  | 16          |
| Lim, 2013         | 1 | 1 | 1 | 1 | 0 | 1 | 1 | 0 | 1 | 1  | 1  | 1  | 1  | 0  | 0  | 1  | 1  | 1  | 1  | 1  | 1  | 1  | 0  | 0  | 0  | 1  | 0  | 19          |
| Mukhtar, 2014     | 1 | 1 | 1 | 1 | 0 | 1 | 1 | 0 | 1 | 1  | 1  | 1  | 1  | 0  | 0  | 1  | 1  | 1  | 1  | 1  | 1  | 1  | 0  | 0  | 0  | 1  | 0  | 19          |
| Al-Thaqafy, 2014  | 1 | 1 | 1 | 1 | 0 | 1 | 1 | 0 | 1 | 1  | 1  | 1  | 1  | 0  | 0  | 1  | 1  | 1  | 1  | 1  | 1  | 1  | 0  | 0  | 0  | 1  | 0  | 19          |

| <b>Sepsis bundle</b> | <b>1</b> | <b>2</b> | <b>3</b> | <b>4</b> | <b>5</b> | <b>6</b> | <b>7</b> | <b>8</b> | <b>9</b> | <b>10</b> | <b>11</b> | <b>12</b> | <b>13</b> | <b>14</b> | <b>15</b> | <b>16</b> | <b>17</b> | <b>18</b> | <b>19</b> | <b>20</b> | <b>21</b> | <b>22</b> | <b>23</b> | <b>24</b> | <b>25</b> | <b>26</b> | <b>27</b> | <b>Total score</b> |
|----------------------|----------|----------|----------|----------|----------|----------|----------|----------|----------|-----------|-----------|-----------|-----------|-----------|-----------|-----------|-----------|-----------|-----------|-----------|-----------|-----------|-----------|-----------|-----------|-----------|-----------|--------------------|
| Memon, 2012          | 1        | 1        | 1        | 1        | 0        | 1        | 1        | 0        | 1        | 1         | 1         | 1         | 1         | 0         | 0         | 0         | 1         | 1         | 1         | 1         | 1         | 1         | 0         | 0         | 0         | 1         | 1         | 19                 |
| Schramm, 2011        | 1        | 1        | 1        | 1        | 0        | 1        | 1        | 0        | 1        | 1         | 1         | 1         | 1         | 0         | 0         | 1         | 1         | 1         | 1         | 1         | 1         | 1         | 0         | 0         | 0         | 1         | 0         | 19                 |
| Kim, 2012            | 1        | 1        | 1        | 1        | 0        | 1        | 1        | 0        | 1        | 1         | 1         | 1         | 1         | 0         | 0         | 1         | 1         | 1         | 1         | 1         | 1         | 1         | 0         | 0         | 0         | 1         | 0         | 19                 |
| Guilliano, 2011      | 1        | 1        | 1        | 1        | 0        | 1        | 1        | 0        | 1        | 1         | 1         | 1         | 1         | 0         | 0         | 1         | 1         | 1         | 1         | 1         | 1         | 1         | 0         | 0         | 0         | 1         | 0         | 19                 |
| Ferrer, 2008         | 1        | 1        | 1        | 1        | 0        | 1        | 1        | 0        | 1        | 1         | 1         | 1         | 1         | 0         | 0         | 1         | 1         | 1         | 1         | 1         | 1         | 1         | 0         | 0         | 0         | 1         | 1         | 20                 |
| Laguna Perez, 2012   | 1        | 1        | 1        | 1        | 0        | 1        | 1        | 0        | 1        | 1         | 1         | 1         | 1         | 0         | 0         | 1         | 1         | 1         | 1         | 1         | 1         | 1         | 0         | 0         | 0         | 1         | 0         | 19                 |
| Castellanos, 2010    | 1        | 1        | 1        | 1        | 0        | 1        | 1        | 0        | 1        | 1         | 1         | 1         | 1         | 0         | 0         | 1         | 1         | 1         | 1         | 1         | 1         | 1         | 0         | 0         | 0         | 1         | 0         | 19                 |
| Lefrant, 2010        | 1        | 1        | 1        | 1        | 0        | 1        | 1        | 0        | 1        | 1         | 1         | 1         | 1         | 0         | 0         | 1         | 1         | 1         | 1         | 1         | 1         | 1         | 0         | 0         | 0         | 1         | 1         | 20                 |
| Silverman, 2011      | 1        | 1        | 1        | 1        | 0        | 1        | 1        | 0        | 1        | 1         | 1         | 1         | 1         | 0         | 0         | 0         | 1         | 1         | 0         | 1         | 1         | 1         | 0         | 0         | 0         | 1         | 0         | 17                 |
